# Supplementary material for: Positive regulation of active sites for oxygen evolution reactions by encapsulating NiFe2O4 nanoparticles in N-doped carbon nanotubes in situ to construct efficient bifunctional oxygen catalysts for rechargeable Zn–air batteries
Source: Royal Society of Chemistry journal article supplement (doi:10.1039/d1ta10881f), 2022-01-01
Supplement: d1ta10881f1.pdf [file d1ta10881f1.pdf]

**Positively regulating the active sites to oxygen evolution reaction by *in situ* encapsulating NiFe<sub>2</sub>O<sub>4</sub> nanoparticles in N-doped carbon nanotubes to construct efficient bifunctional oxygen catalyst for rechargeable Zn-air batteries**

Yibo Tang<sup>a,1</sup>, Ying Lei<sup>a,1</sup>, Guijun Li<sup>a</sup>, Tiantian Fu<sup>a</sup>, Yang Xiang<sup>a</sup>, Jingqi Sha<sup>a</sup>, Hai Yang<sup>a</sup>, Peng Yu<sup>a</sup>, Yujun Si<sup>a,\*</sup>, Chaozhong Guo<sup>b,\*</sup>

<sup>a</sup> College of Chemistry and Environmental Engineering, Sichuan University of Science and Engineering, Zigong 643000, China

<sup>b</sup> College of Materials Science and Engineering, Chongqing University of Arts and Sciences, Chongqing 402160, China

**1. UV-Vis diffuse reflectance spectra and FTIR spectra**

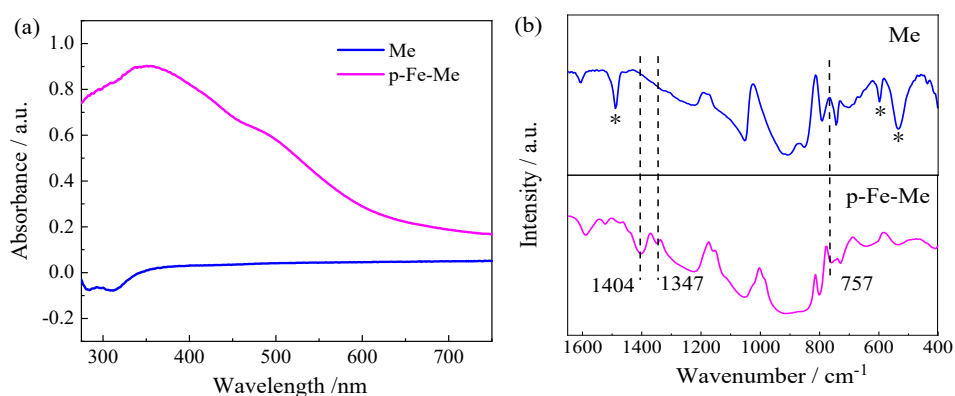

Figure S1 (a) UV-Vis diffuse reflectance spectra, (b) FTIR spectra of Melamine (Me) and precursor p-Fe-Me (“\*” represents the weakened peaks).

**2. Thermogravimetry analysis**

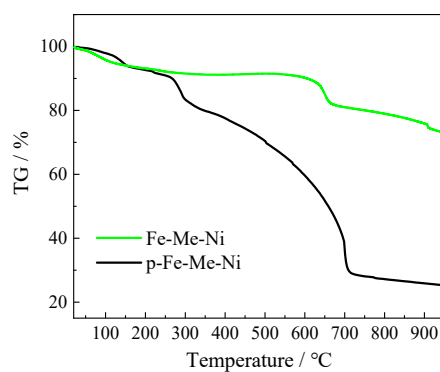

Figure S2 Thermogravimetry curves of Fe-Me-Ni and its precursor (p-Fe-Me-Ni).

### 3. RRDE measurement

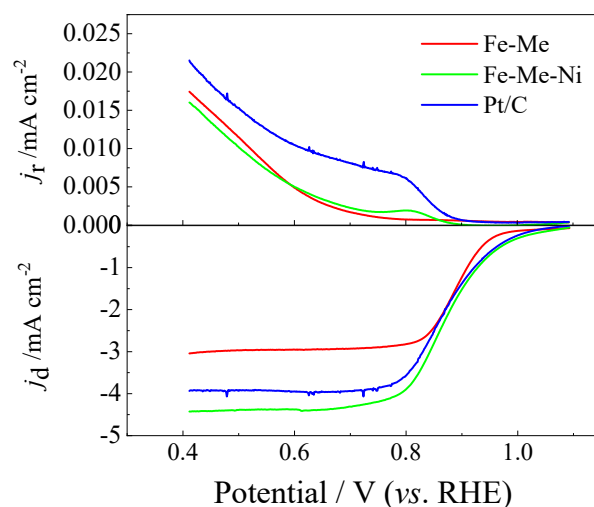

Figure S3 LSV curves on RRDE

### 4. Calculation of electrochemical active surface area (ECSA)

Cyclic voltammetry (CV) of catalyst was carried out in a potential range of 1.01~1.11 V (vs. RHE), at 2, 4, 6, 8, 10 and 12  $\text{mV s}^{-1}$  of scan rate. Then a linear plot was drawn between the capacitive current densities at 1.06 V and the scan rate. The fitted slope of the plot represents the electrical double layer capacitance  $C_{dl}$  which can be employed to assess the electrochemical active surface area (ECSA). The higher  $C_{dl}$  corresponds to the greater ECSA.

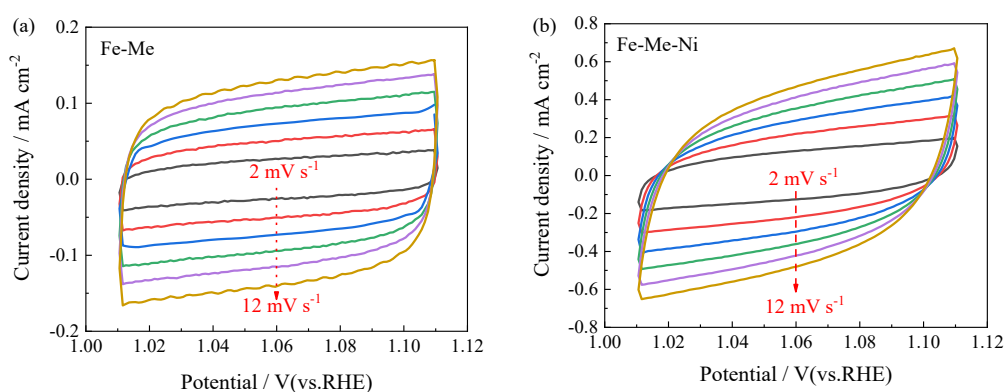

Figure S4 CV curves, (a) Fe-Me, (b) Fe-Me-Ni at various scan rates in 0.1 M KOH solution in a potential window without Faradaic current.

## 5. Galvanostatic discharge of Zn-air batteries

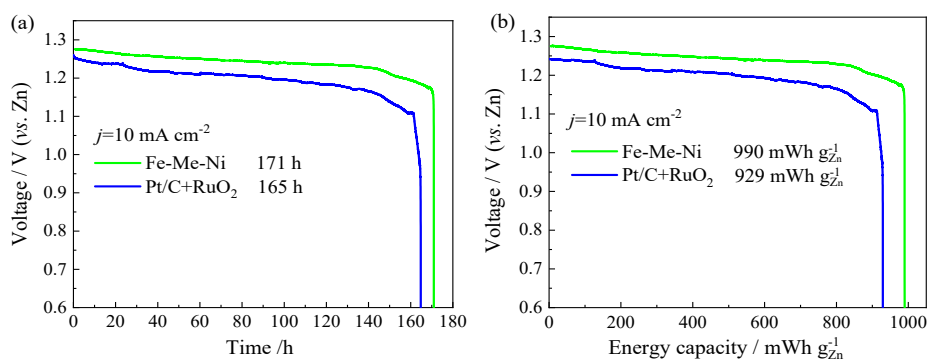

Figure S5 (a) Galvanostatic discharge curves of Zn-air batteries, (b) energy density of Zn-air batteries based on the loss of the Zn anode

## 6. Characterization of the aged Fe-Me-Ni

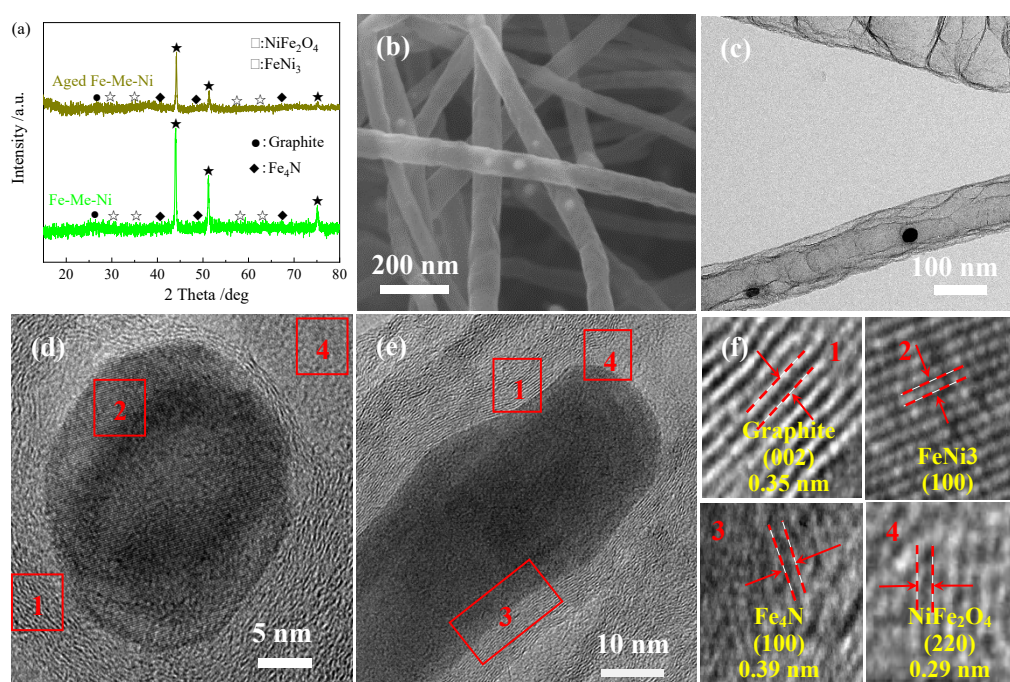

Figure S6 (a) XRD patterns of Fe-Me-Ni before and after aging experiment (Aged Fe-Me-Ni), (b) SEM image, (c) TEM image, (d, e) HRTEM images of the aged Fe-Me-Ni, (f) lattice fringes of graphite, FeNi<sub>3</sub>, Fe<sub>4</sub>N, and NiFe<sub>2</sub>O<sub>4</sub> for region “1”, “2”, “3”, “4” circled in (d, e), respectively.

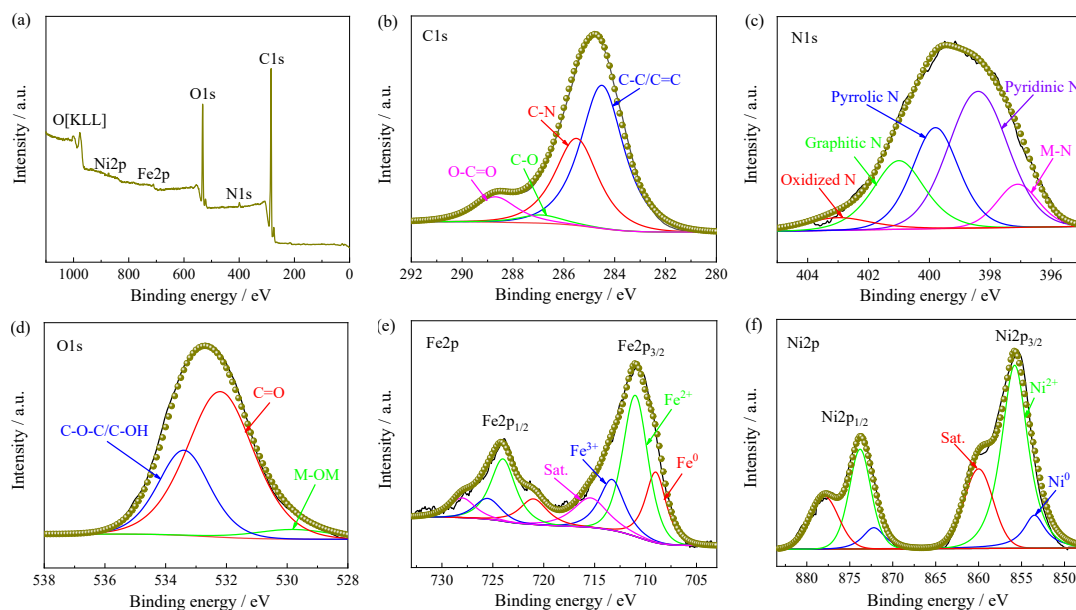

Figure S7 (a) XPS survey spectrum of aged catalyst Fe-Me-Ni, and the corresponding high-resolution XPS spectra of (b) C1s, (c) N1s, (d) O1s, (e) Fe2p, (f) Ni2p.

## 7. Comparison table on the catalytic performance of Fe-Me-Ni with references

Table S1 Comparison on the electrocatalytic activities of Fe-Me-Ni and performance of Zn-air batteries with recently reported bifunctional catalysts

| Catalysts                                             | ORR<br>$E_{1/2}/V$ | OER<br>$E_{10}/V$ | $\Delta E/V$ | Specific capacity<br>$\text{mAh g}^{-1}$ | References |
|-------------------------------------------------------|--------------------|-------------------|--------------|------------------------------------------|------------|
| Fe-Me-Ni                                              | 0.841              | 1.543             | 0.702        | 798                                      | This work  |
| Co <sub>2</sub> P@NCNTs-15                            | 0.82               | 1.806             | 0.986        | 792.6                                    | Ref. 1     |
| FeNCFs                                                | 0.84               | 1.63              | 0.79         | 717                                      | Ref. 2     |
| Co-Co <sub>6</sub> Mo <sub>6</sub> C <sub>2</sub> @NC | 0.80               | 1.50              | 0.70         | 768                                      | Ref. 3     |
| Co <sub>3</sub> W <sub>3</sub> C/CoP/NPC              | 0.803              | 1.43              | 0.627        | 800.5                                    | Ref. 4     |
| Co@IC/MoC@PC                                          | 0.875              | 1.51              | 0.635        | 725                                      | Ref. 5     |
| CoNi/NHCS-TUC-3                                       | 0.88               | 1.686             | 0.806        | 756.5                                    | Ref. 6     |
| FeCo@NS-CA                                            | 0.85               | 1.68              | 0.83         | 760                                      | Ref. 7     |
| Co-UA-OCB                                             | 0.834              | 1.621             | 0.787        | 799                                      | Ref. 8     |
| CoFe/S-N-C                                            | 0.855              | 1.588             | 0.733        | 814                                      | Ref. 9     |
| FeCo-1/NSC                                            | 0.82               | 1.555             | 0.735        | 776                                      | Ref. 10    |

## References:

- (1) X. Peng, Y. Liu, S. Hu, P. Zheng, Y. Fu, P. Dong, J. Xiao, L. Han, Y. Zhang, Synthesis of a Highly Efficient Bifunctional  $\text{Co}_2\text{P}@N$ -doped Carbon Nanotubes Electrocatalyst by GO-Induced Assembly Strategy for Rechargeable Zn-Air Batteries, *J. Alloys Compd.*, 2021, 889, 161628.
- (2) Y. Ma, D. Chen, D. Zhang, H. Yu, Y. Zheng, W. Li, L. Wang, Q. Liu, W. Yang, Fe,N-Modulated Carbon Fibers Aerogel as Freestanding Cathode Catalyst for Rechargeable Zn-Air Battery, *Carbon*, 2022, 187, 196-206.
- (3) S. Chen, X. Liu, H. Sun, Z. Cao, J. Xiong, Y. Li, Facile Synthesis of Carbon Coated Cobalt-cobalt Molybdenum Carbide as Advanced Bifunctional Oxygen Electrocatalyst for Rechargeable Zn-Air Battery, *J. Alloys Compd.*, 2022, 897, 163203.
- (4) Y. Zhang, W. Shi, L. Bo, Y. Shen, X. Ji, L. Xia, X. Guan, Y. Wang, J. Tong, Electrospinning Construction of Heterostructural  $\text{Co}_3\text{W}_3\text{C}/\text{CoP}$  Nanoparticles Embedded in N,P-doped Hierarchically Porous Carbon Fibers as Excellent Multifunctional Electrocatalyst for Zn-Air Batteries and Water Splitting, *Chem. Eng. J.*, 2022, 431, 134188.
- (5) L. Zhang, Y. Zhu, Z. Nie, Z. Li, Y. Ye, L. Li, J. Hong, Z. Bi, Y. Zhou, G. Hu Co/MoC Nanoparticles Embedded in Carbon Nanoboxes as Robust Trifunctional Electrocatalysts for a Zn-Air Battery and Water Electrocatalysis, *ACS Nano*, 2021, 15, 13399-13414.
- (6) K. Sheng, Q. Yi, A.L. Chen, Y. Wang, Y. Yan, H. Nie, X. Zhou, CoNi

Nanoparticles Supported on N-Doped Bifunctional Hollow Carbon Composites as High-Performance ORR/OER Catalysts for Rechargeable Zn-Air Batteries, *ACS Appl. Mater. Interfaces*, 2021, 13, 45394-45405.

(7) H. Pang, P. Sun, H. Gong, N. Zhang, J. Cao, R. Zhang, M. Luo, Y. Li, G. Sun, Y. Li, J. Deng, M. Gao, M. Wang, B. Kong, Wood-Derived Bimetallic and Heteroatomic Hierarchically Porous Carbon Aerogel for Rechargeable Flow Zn-Air Batteries, *ACS Appl. Mater. Interfaces*, 2021, 13, 39458-39469.

(8) T. Fu, G. Li, Y. Xiang, Y. Tang, D. Cai, S. Jiang, Y. Xue, Z. Xiong, Y. Si, C. Guo, Hierarchical Cobalt-Nitrogen-Doped Carbon Composite as Efficiently Bifunctional Oxygen Electrocatalyst for Rechargeable Zn-Air batteries, *J. Alloys Compd.*, 2021, 878, 160349.

(9) G. Li, Y. Tang, T. Fu, Y. Xiang, Z. Xiong, Y. Si, C. Guo, Z. Jiang, S, N Co-doped Carbon Nanotubes Coupled with CoFe Nanoparticles as an Efficient Bifunctional ORR/OER Electrocatalyst for Rechargeable Zn-air Batteries. *Chem. Eng. J.*, 2022, 429, 132174.

(10) S. Chang, H. Zhang, Z. Zhang, FeCo Alloy/N, S Dual-Doped Carbon Composite as a High-Performance Bifunctional Catalyst in an Advanced Rechargeable Zinc-Air Battery, *J. Energy Chem.*, 2021, 56, 64-71.
